# Supplementary material for: Effect of remote substituents and coordination anions on the magnetic properties of Co(ii) dimer complexes
Source: Royal Society of Chemistry journal article supplement (doi:10.1039/d3ce00523b), 2023-01-01
Supplement: d3ce00523b1.pdf [file d3ce00523b1.pdf]

# Supporting Information (SI)

## Remote substitutes and coordination anions effect on magnetic properties of Co(II) dimmer complexes

Tong-Kai Luo,<sup>a</sup> Xiang Zhong,<sup>a</sup> Qing-Yun Zhang,<sup>a</sup> Xiao-Feng Chen,<sup>a</sup> Hui Xu,<sup>a</sup> Yan Peng,<sup>\*a</sup> Sui-Jun Liu,<sup>\*a</sup> Zhao-Bo Hu,<sup>\*ab</sup> and He-Rui Wen<sup>a</sup>

<sup>a</sup>School of Chemistry and Chemical Engineering, Jiangxi Provincial Key Laboratory of Functional Molecular Materials Chemistry, Jiangxi University of Science and Technology, Ganzhou 341000, Jiangxi Province, P. R. China. E-mail: py16882020@163.com (Y. Peng); sjliu@jxust.edu.cn (S.-J. Liu), Tel: +86-0797-8312204.

<sup>b</sup>Chaotic Matter Science Research Center, Faculty of Materials Metallurgy and Chemistry, Jiangxi University of Science and Technology, Ganzhou 341000, P. R. China. E-mail: huzhaobo@smail.nju.edu.cn (Z.-B. Hu)

## Experimental

### General information

All chemicals and solvents were obtained from commercial sources without further purification. All reactions were carried out under aerobic conditions. The elemental analyses (C, H, and N) were carried out using an Elementar Vario EL analyzer. Fourier transform IR spectra (4000 to 400  $\text{cm}^{-1}$ ) were measured on a Perkin-Elmer Spectrum GX spectrometer with samples prepared as KBr discs. Powder X-ray diffraction was carried out on a STOE STADI-P diffractometer, using Cu-K $\alpha$  radiation with  $\lambda = 1.5406 \text{ \AA}$ . Thermogravimetric analyses (TGA) were carried out on a NETZSCH STA2500 (TG/DTA) thermal analyzer under an inert atmosphere (maintained by a  $\text{N}_2$  gas flow) at a heating rate of  $10 \text{ }^\circ\text{C min}^{-1}$ .

### X-ray crystal structures

The crystal structures were determined at room temperature on a Bruker diffractometer with graphite-monochromator Mo-K $\alpha$  radiation. The structures were solved by direct methods and refined by full-matrix least-squares using the SHELXTL program suite.

### Physical measurements

Variable-temperature dc magnetic susceptibility measurements and ac magnetic susceptibility measurements were conducted on microcrystalline samples, suspended in eicosane to prevent torquing. Magnetic susceptibility data (2-300 K) were collected on powdered samples using a SQUID-based sample magnetometer, Quantum Design model MPMS-VSM instrument under a 1000 Oe applied magnetic field. Magnetization isotherms were collected at 1.8 K, 2 K, 5 K and 10 K between 0 and 7 T. Ac susceptibility measurements were carried out under an oscillating ac field of 2 Oe and ac frequencies ranging from 1 to 1000 Hz. Data were corrected for diamagnetism using Pascal constants and a sample holder correction.

### Synthesis of Ligands

The two ligands were synthesized by same method, therefore only  $\text{H}_2\text{L1}$  will be discussed in detail.

$\text{N, N}'\text{-bis}[(2\text{-hydroxybenzylideneamino})\text{-propyl}]\text{-piperazine}$  ( $\text{H}_2\text{L1}$ )

An ethanol solution containing salicylaldehyde (10 mmol, 1.20 g) was mixed with 1,4-bis (3-aminopropyl) piperazine (5 mmol, 1.00 g) in ethanol. The yellow mixture was refluxed for 8 hours under stirring. The desired yellow product was obtained by slow evaporation of the solution.  $\text{H}_2\text{L1}$  ( $\text{N, N}'\text{-bis}[(2\text{-hydroxybenzylideneamino})\text{-propyl}]\text{-piperazine}$ ) Yield: 1.80 g (88% based on 1,4-bis (3-aminopropyl) piperazine). Anal. calc. (%) for  $\text{C}_{24}\text{H}_{32}\text{N}_4\text{O}_2 \cdot 2\text{H}_2\text{O}$  (444.57): C, 64.84; H, 8.16; N, 12.60 wt %; found: C, 64.74; H, 8.23; N, 12.87 wt %.  $^1\text{H NMR}$  (400 MHz,  $\text{CDCl}_3$ )  $\delta$  13.56 (s, 2H), 8.35 (s, 2H), 7.35-7.27 (m, 2H), 7.24 (dd,  $J = 7.7, 1.7 \text{ Hz}$ , 2H), 6.96 (dd,  $J = 8.3, 1.0 \text{ Hz}$ , 2H), 6.88 (td,  $J = 7.5, 1.1 \text{ Hz}$ , 2H), 3.64 (td,  $J = 6.8, 1.2 \text{ Hz}$ , 4H), 2.43 (d,  $J = 7.7 \text{ Hz}$ , 12H), 1.89 (p,  $J = 6.9 \text{ Hz}$ , 4H). FT-IR (KBr,  $\text{cm}^{-1}$ ): 3742 (w), 3679 (w), 3054 (w), 2934 (m), 2809 (m), 1633 (vs), 1499 (m), 1453 (m), 1345 (w), 1280 (s), 1204 (w), 1144 (m), 970 (w), 889 (m), 755 (s), 640 (w).

$\text{N, N}'\text{-bis}(2\text{-hydroxy-5-bromobenzyl})\text{-1,4-bis}(3\text{-iminopropyl})\text{-piperazine}$  ( $\text{H}_2\text{L2}$ )

The synthesis of  $\text{H}_2\text{L2}$  is the same as that of  $\text{H}_2\text{L1}$  by replacing the salicylaldehyde to 5-bromosalicylaldehyde. Yield: 1.90 g (67% based on 1,4-bis (3-aminopropyl) piperazine). Anal. calc. (%) for  $\text{C}_{24}\text{H}_{30}\text{Br}_2\text{N}_4\text{O}_2$  (566.33): C, 50.90; H, 5.34; N, 9.89 wt %; found: C, 50.90; H, 5.00; N, 10.10 wt %.  $^1\text{H NMR}$  (400 MHz,  $\text{CDCl}_3$ )  $\delta$  13.60 (s, 2H), 8.28 (s, 2H), 7.37 (dt,  $J = 5.5, 2.4 \text{ Hz}$ , 4H), 6.86 (d,  $J = 8.7 \text{ Hz}$ , 2H), 3.66 (t,  $J = 6.7 \text{ Hz}$ , 4H), 2.89-2.21 (m,

12H), 1.94-1.82 (m, 4H). FT-IR (KBr,  $\text{cm}^{-1}$ ): 3743 (s), 3676 (w), 3617 (w), 2934 (m), 2811 (m), 2765 (w), 1695 (w), 1636 (s), 1517 (w), 1478 (w), 1365 (m), 1274 (s), 1165 (w), 969 (w), 825 (s), 627 (w).

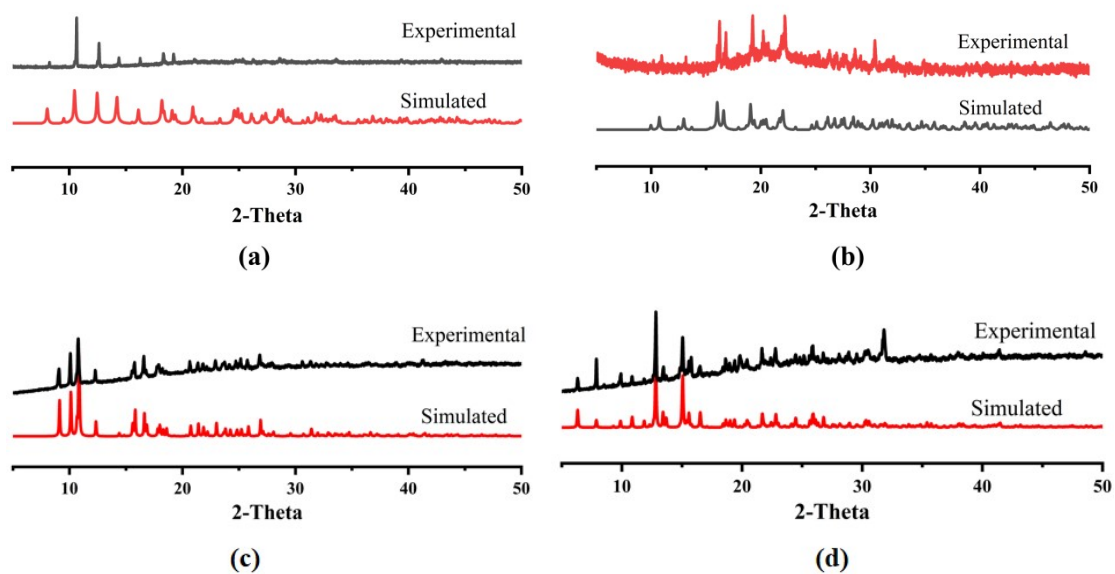

Fig. S1 Powder X-ray diffraction data for 1-4 (a-d).

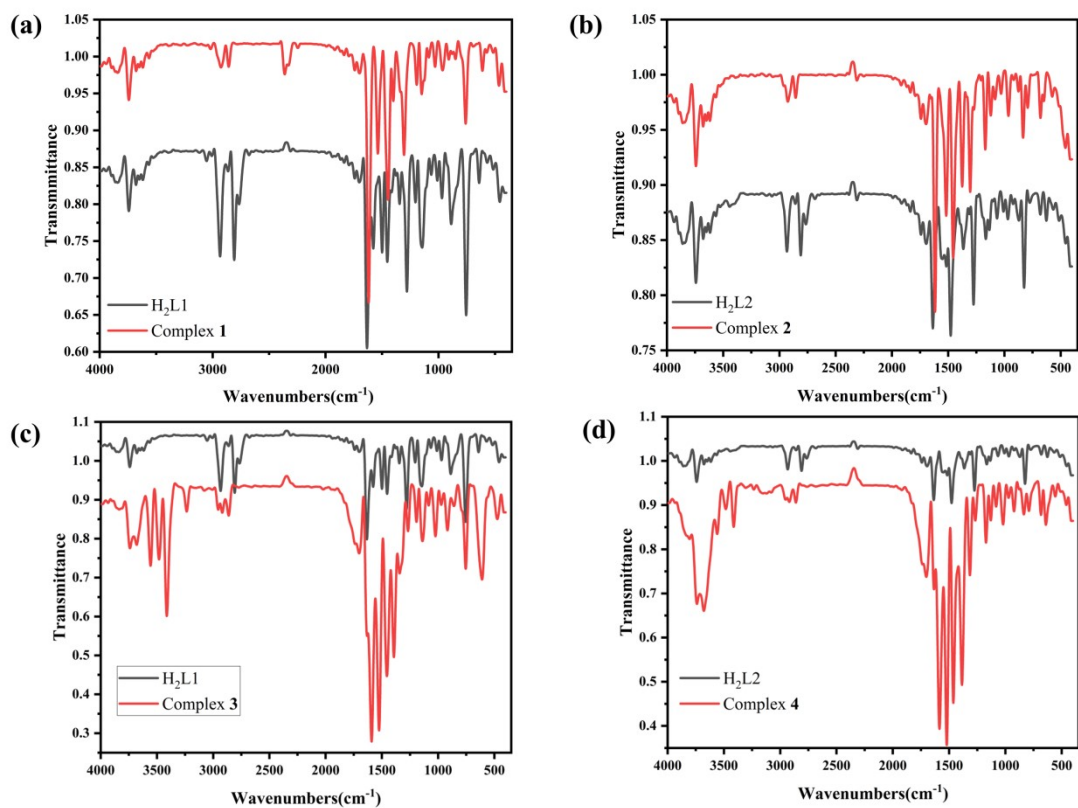

Fig. S2 IR spectroscopy of complexes 1-4 (a-d)

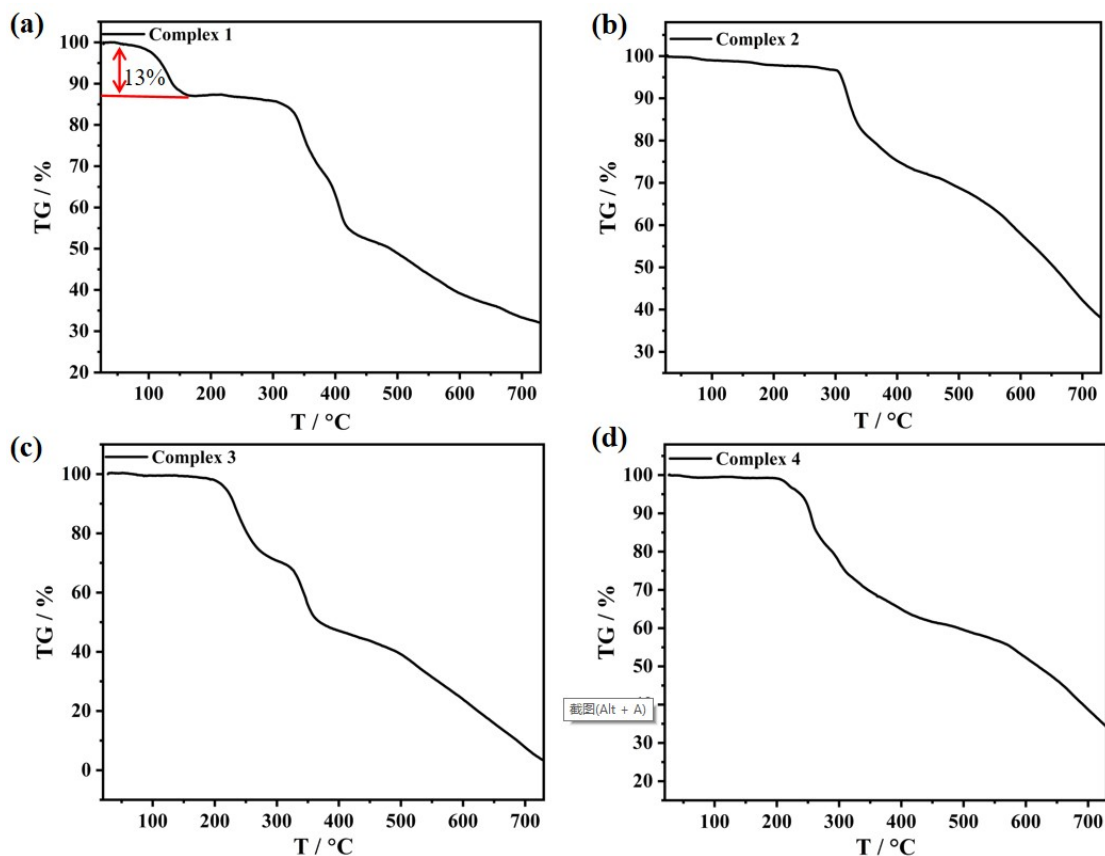

**Fig.S3.** TGA plots of complexes 1-4 (a-d).

**Table 3.** Continuous Shape Measures (CShMs) of the coordination geometry for Co(II) ion in complexes 1-4.

| Complexes | Label   | Shape                          | Symmetry        | Distortion |
|-----------|---------|--------------------------------|-----------------|------------|
| <b>1</b>  | SP-4    | Square                         | D <sub>4h</sub> | 25.2098    |
|           | T-4     | Tetrahedron                    | T <sub>d</sub>  | 2.0319     |
|           | SS-4    | Seesaw                         | C <sub>2v</sub> | 7.1444     |
| <b>2</b>  | SP-4    | Square                         | D <sub>4h</sub> | 27.3930    |
|           | T-4     | Tetrahedron                    | T <sub>d</sub>  | 1.7353     |
|           | SS-4    | Seesaw                         | C <sub>2v</sub> | 7.8209     |
| <b>3</b>  | PP-5    | Pentagon                       | D <sub>5h</sub> | 34.03126   |
|           | vOC-5   | Vacant octahedron              | C <sub>4v</sub> | 5.75785    |
|           | TBPY-5  | Trigonal bipyramid             | D <sub>3h</sub> | 0.36928    |
|           | SPY-5   | Spherical square pyramid       | C <sub>4v</sub> | 3.77594    |
|           | JTBPY-5 | Johnson trigonal bipyramid J12 | D <sub>3h</sub> | 3.18736    |
| <b>4</b>  | PP-5    | Pentagon                       | D <sub>5h</sub> | 33.28680   |
|           | vOC-5   | Vacant octahedron              | C <sub>4v</sub> | 3.87570    |
|           | TBPY-5  | Trigonal bipyramid             | D <sub>3h</sub> | 1.04673    |
|           | SPY-5   | Spherical square pyramid       | C <sub>4v</sub> | 2.36315    |
|           | JTBPY-5 | Johnson trigonal bipyramid J12 | D <sub>3h</sub> | 3.52584    |

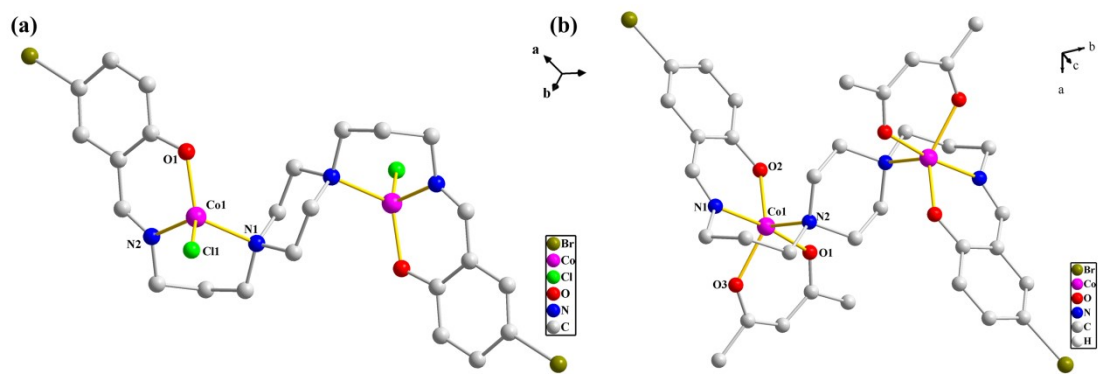

**Fig. S3** Molecular structures of complexes **2** and **4** (left and right)

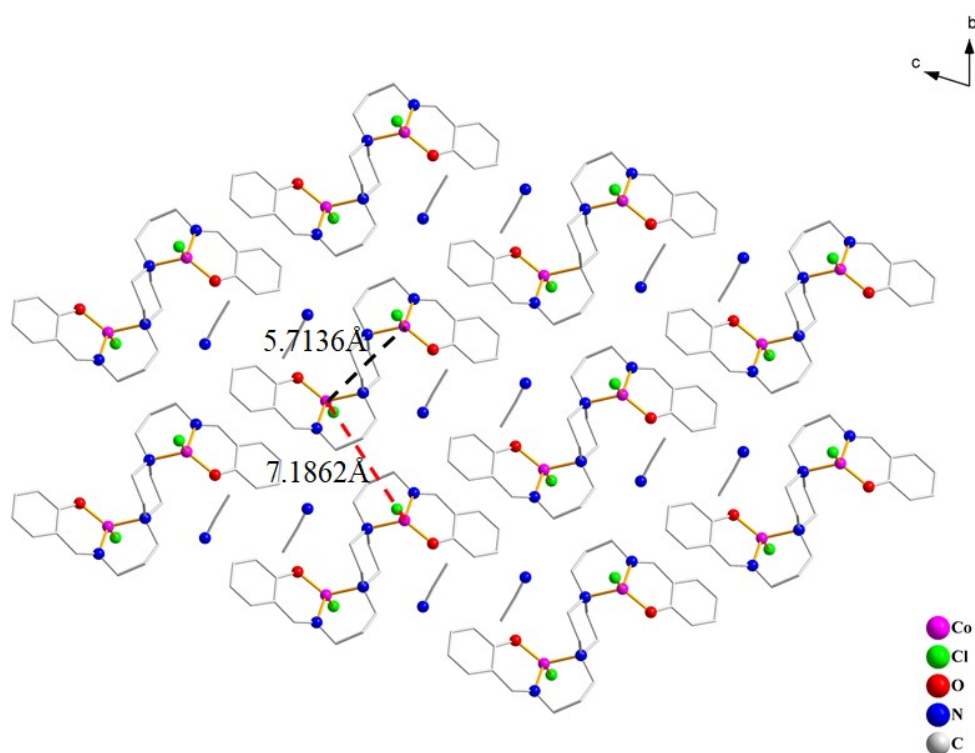

**Fig. S5** Packing of complex **1**. dash lines are the intramolecular Co-Co distances (black dash line) and intermolecular Co-Co (red dash line) distances withing the complex.

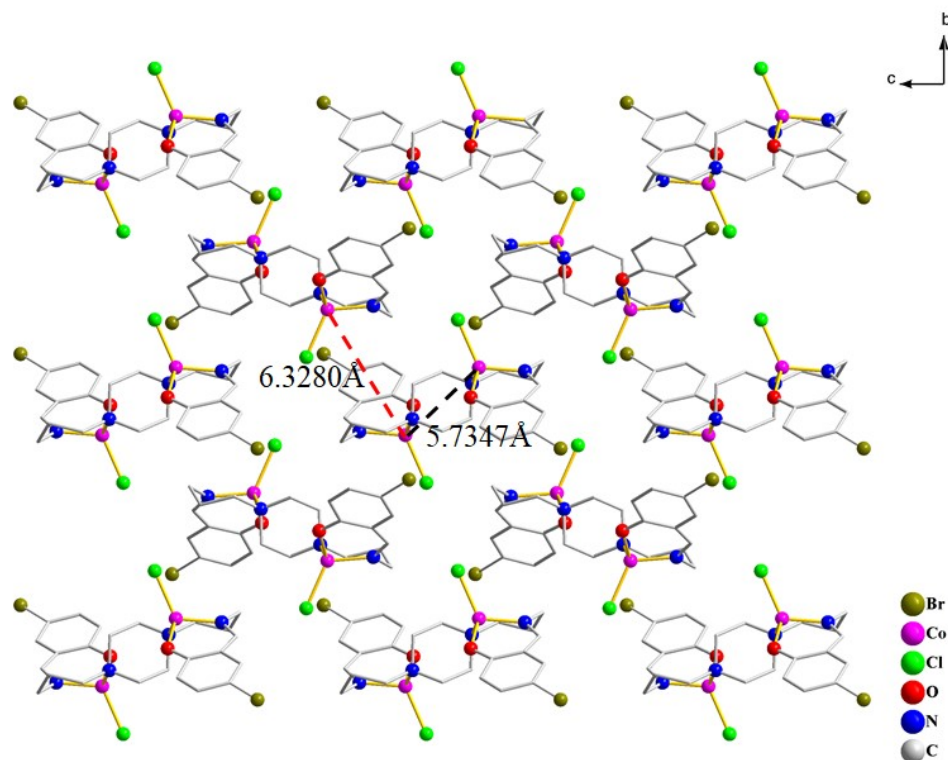

**Fig. S6** Packing of complex 2. dash lines are the intramolecular Co-Co distances (black dash line) and intermolecular Co-Co (red dash line) distances within the complex.

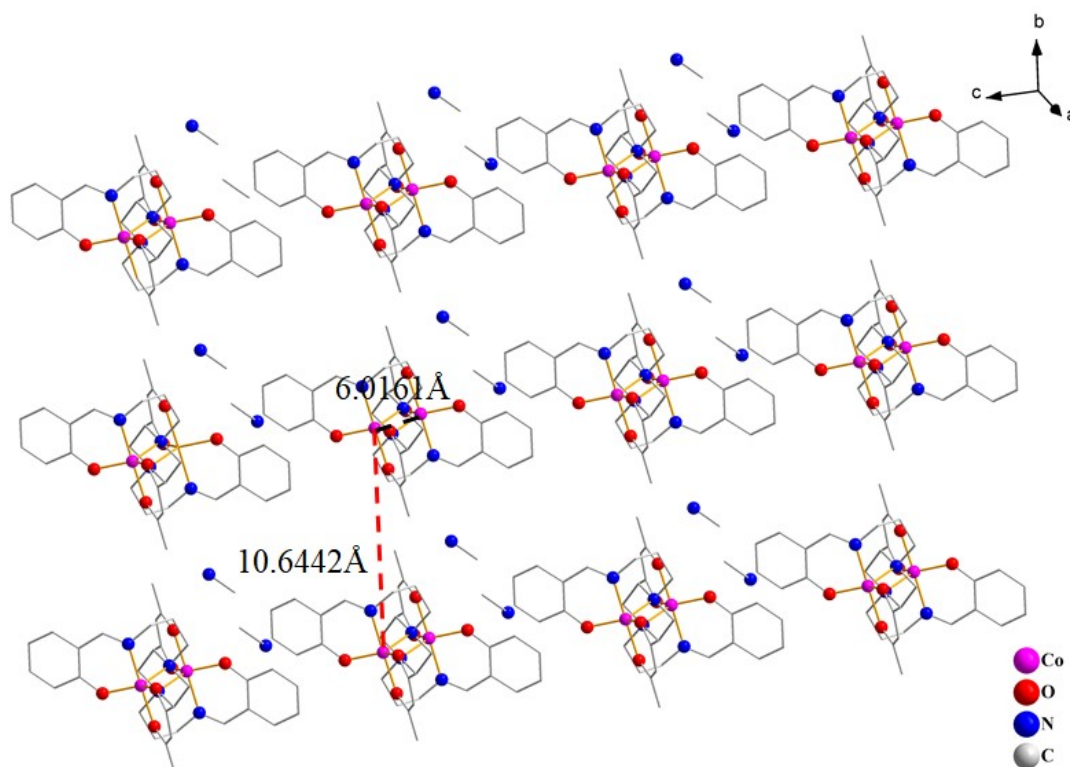

**Fig. S7** Packing of complex 3. dash lines are the intramolecular Co-Co distances (black dash line) and intermolecular Co-Co (red dash line) distances within the complex.

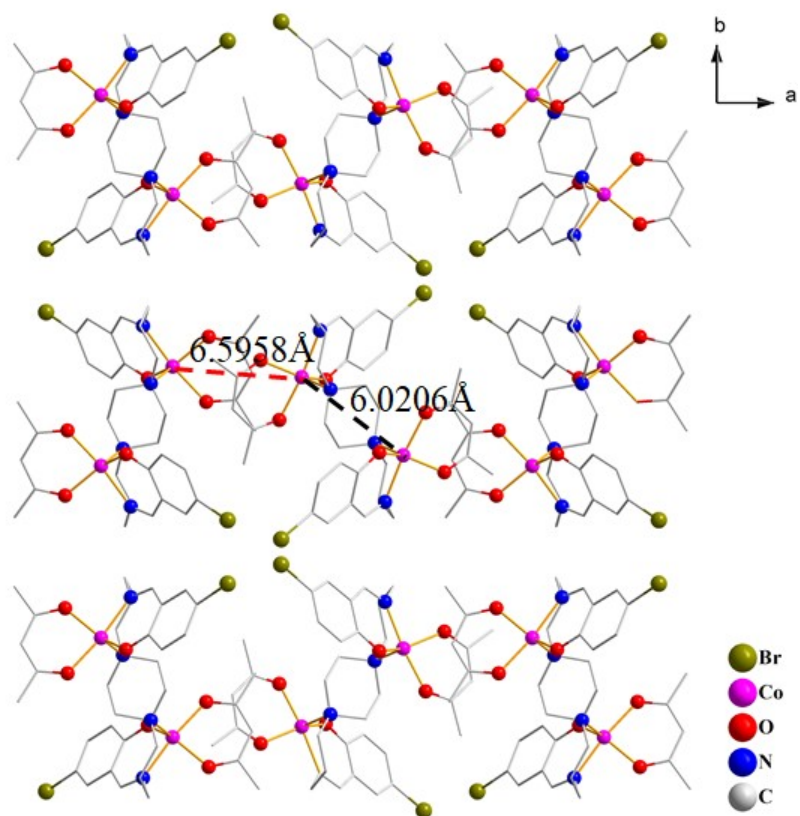

**Fig. S8** Packing of complex 4. dash lines are the intramolecular Co-Co distances (black dash line ) and intermolecular Co-Co (red dash line) distances within the complex.

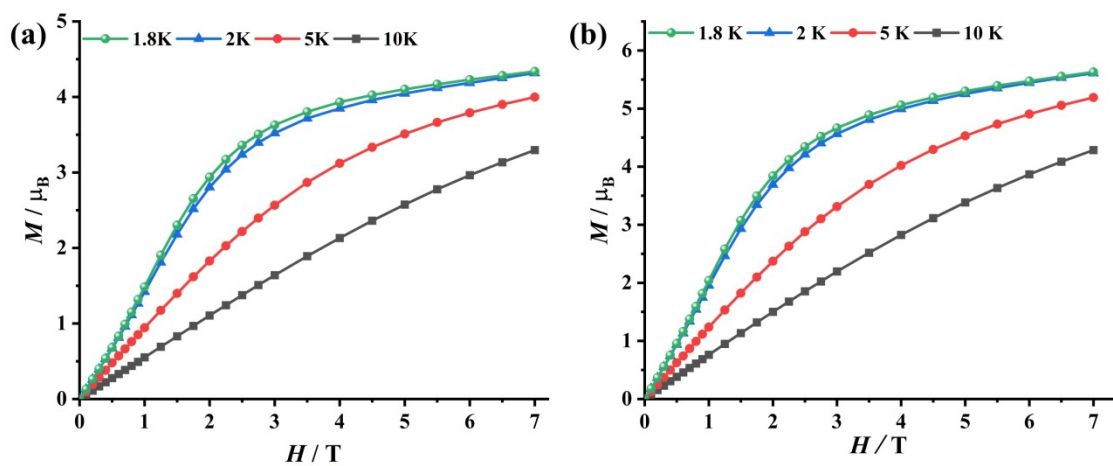

**Fig. S9** Plots of  $M$  vs  $H$  at different temperature for complexes 1 and 2 (left to right)

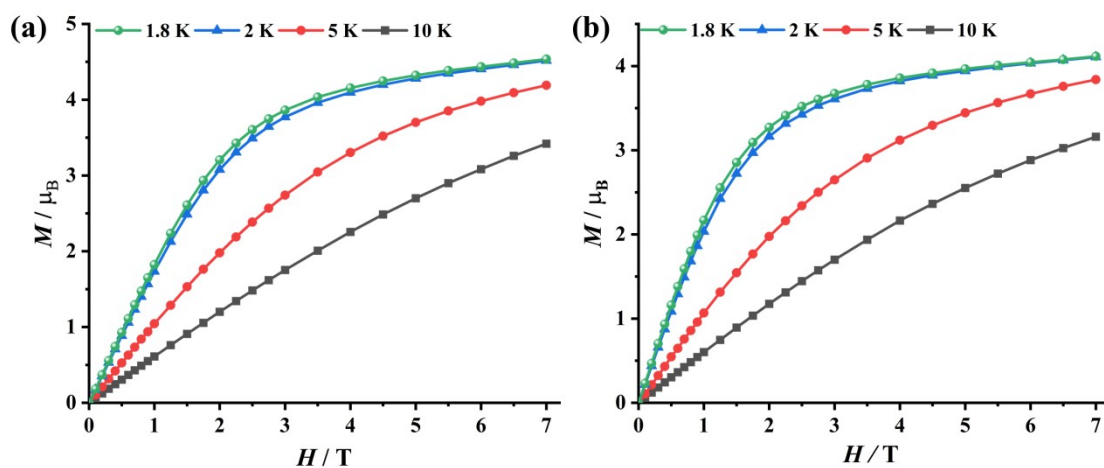



**Fig. S10** Plots of M vs H at different temperature for complexes **3** and **4**(left to right)

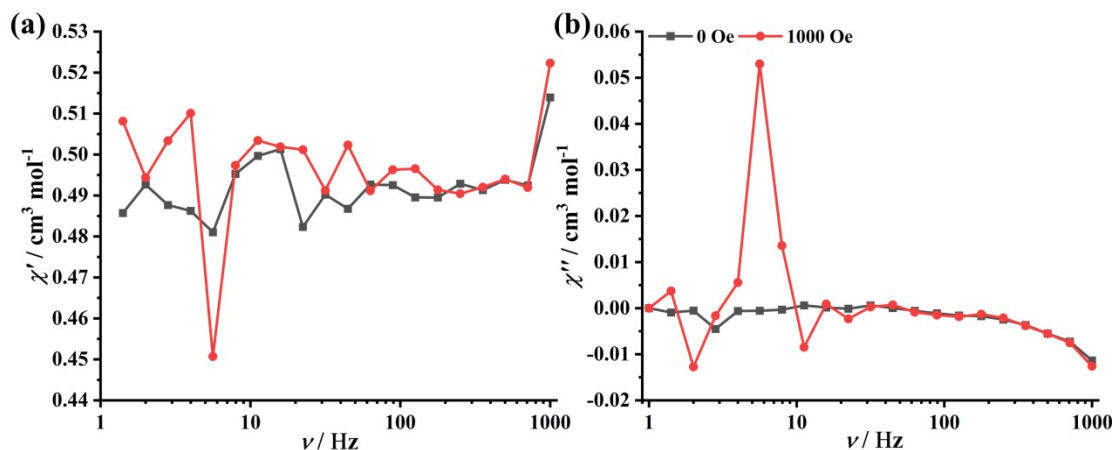

**Fig. S11** Plots of  $\chi'$  (left) and  $\chi''$  (right) vs frequencies at 2 K in different dc fields for complex **2**

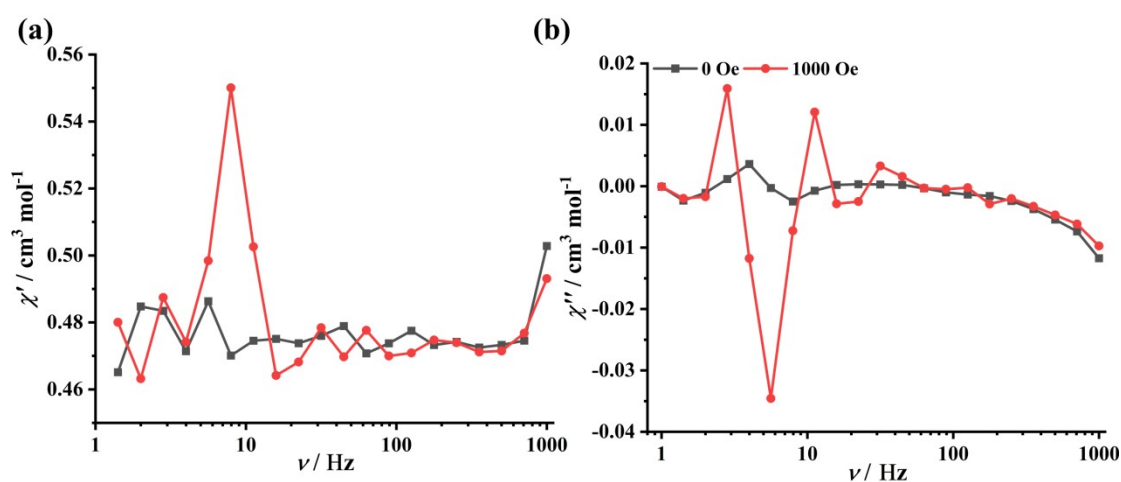

**Fig. S12** Plots of  $\chi'$  (left) and  $\chi''$  (right) vs frequencies at 2 K in different dc fields for complex **3**

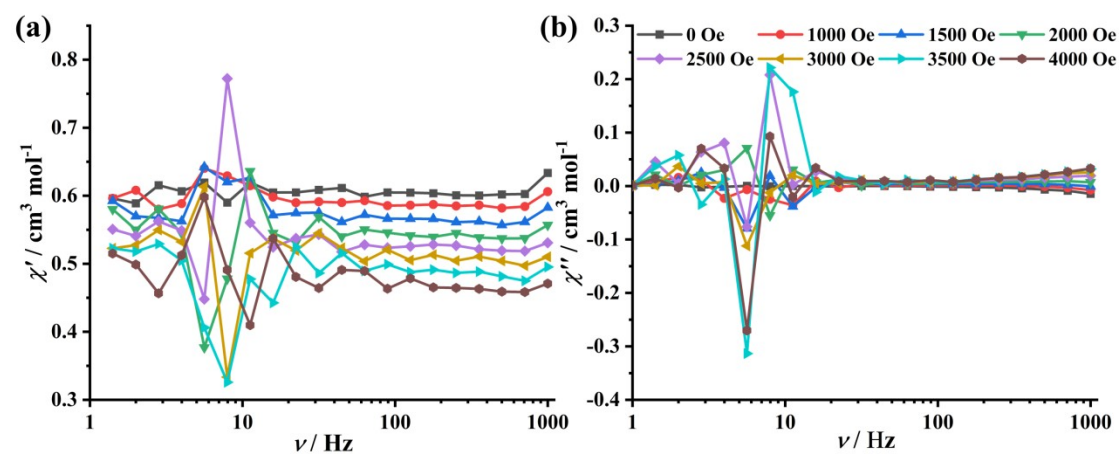

**Fig. S13** Plots of  $\chi'$  (left) and  $\chi''$  (right) vs frequencies at 2 K in different dc fields for complex **4**
